# Supplementary material
Source: MDPI journal article supplement (https://www.mdpi.com/2079-6412/10/1/50)
Supplement: s1 [file s1]

# Design Strategy for Self-Healing Epoxy Coatings

Dian Yuan <sup>1</sup>, Vahab Solouki Bonab <sup>1</sup>, Ammar Patel <sup>1</sup>, Talha Yilmaz <sup>2</sup>, Richard A Gross <sup>2</sup> and Ica Manas-Zloczower <sup>1,\*</sup>

<sup>1</sup> Department of Macromolecular Science and Engineering, Case Western Reserve University, Cleveland, Ohio 44106, United States; dxy127@case.edu (D.Y.); vxs208@case.edu (V.S.B.); aap89@case.edu (A.P.)

<sup>2</sup> Department of Chemistry and Chemical Biology, Rensselaer Polytechnic Institute, Troy, New York 12180, United States; yilm1011@gmail.com (T.Y.); grossr@rpi.edu (R.A.G.)

\* Correspondence: ixm@case.edu

Received: 25 November 2019; Accepted: 3 January 2020; Published: 6 January 2020

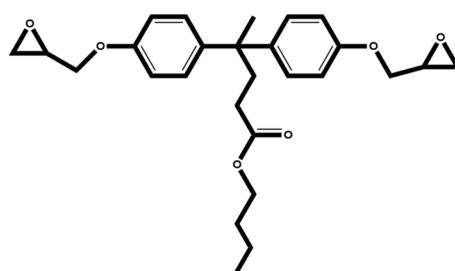

**Figure S1.** Chemical structure of DGEDP-butyl

**Table S1.** Molecular weight of synthesized TPU prepolymers (OH end capped).

|               | [NCO]/[OH] | M <sub>w</sub> (g/mol) | Crystallinity % |
|---------------|------------|------------------------|-----------------|
| <b>TPU0.8</b> | 0.8        | 19400                  | 40.7            |
| <b>TPU0.6</b> | 0.6        | 8580                   | 60.4            |
| <b>TPU0.4</b> | 0.4        | 4950                   | 70.9            |
| <b>TPU0.2</b> | 0.2        | 3115                   | 75.6            |

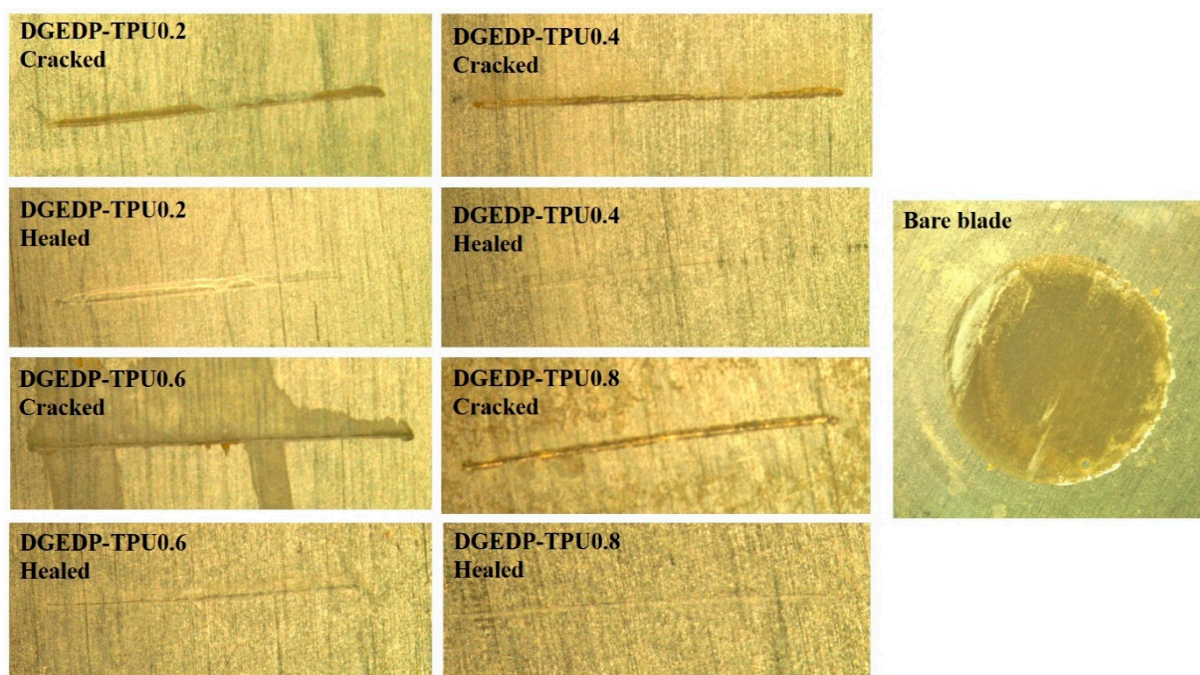

**Figure S2.** Optical microscopy images of the steel substrate after electrochemical treatment.

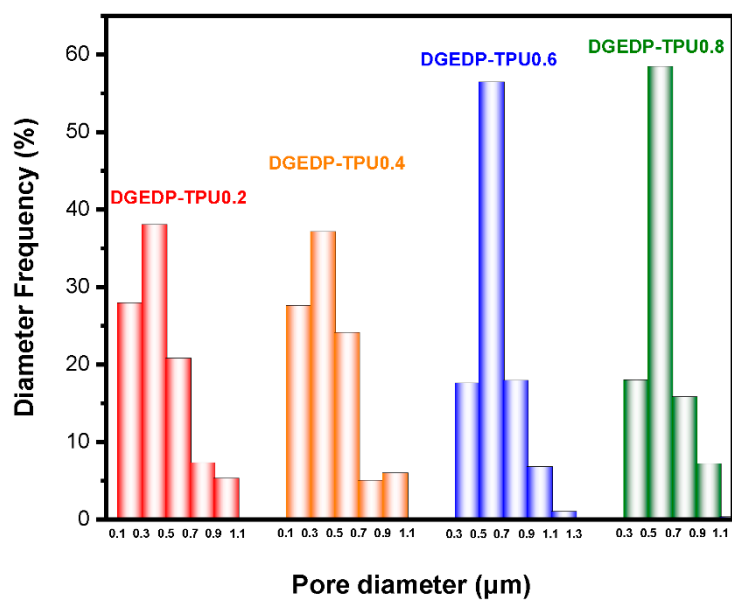

**Figure S3.** Pore diameter distribution of cryo-fractured DGEDP-TPU system surfaces washed with THF.

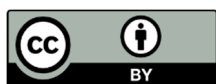

© 2020 by the authors. Submitted for possible open access publication under the terms and conditions of the Creative Commons Attribution (CC BY) license (<http://creativecommons.org/licenses/by/4.0/>).
